# Supplementary material
Source: ML conference proceedings conference paper supplement (https://openreview.net/forum?id=4PckR7nodDq)
Supplement: supplementary_material [file attachment]

# Supplementary Material for “On Using Hamiltonian Monte Carlo Sampling for Reinforcement Learning Problems in High-dimension”

## A Convergence and Boundedness Results

We proceed to prove theorem by stating convergence properties for HMC as follows. In the initial sampling stage, starting from the initial position Markov chain converges towards to the typical set. In the next stage Markov chain quickly traverse the typical set and improves the estimate by removing the bias. In the last stage Markov chain refine the exploration of typical the typical set provide improved estimates. The number of samples taken during the last stage is referred as effective sample size.

### A.1 Proof of Theorem 1

**Theorem 1.** Let  $\mathcal{T}$  be an optimality operator under HMC given as  $(\mathcal{T}Q)(s', a') = r(s', a') + \frac{\gamma}{|\mathcal{H}|} \sum_{s \in \mathcal{H}} \max_a Q(s, a)$ ,  $\forall (s', a') \in \mathcal{S} \times \mathcal{A}$ , where  $\mathcal{H}$  is a subset of next states sampled using HMC from the target distribution given in (6). Then, under update rule (4) and for any given  $\epsilon \geq 0$ , there exists  $n_{\mathcal{H}}, t' > 0$  such that  $\|Q^t - Q^*\|_{\infty} \leq \epsilon \forall t \geq t'$ .

**Proof of Theorem 1.** Let  $\bar{Q}^t(s, a) = \frac{1}{n_{\mathcal{H}}} \max_a Q^t(s, a)$ ,  $\forall (s, a) \in \mathcal{S} \times \mathcal{A}$ . Here we consider  $n_{\mathcal{H}}$  to be the effective number of samples. Let  $\mathbb{E}_{\mathcal{P}} Q^t$ ,  $\text{Var}_{\mathcal{P}} Q^t$  be the expectation and covariance of  $Q^t$  with respect to the target distribution. From Central Limit Theorem for HMC we have

$$\bar{Q}^t \sim \mathcal{N}\left(\mathbb{E}_{\mathcal{P}} Q^t, \sqrt{\frac{\text{Var}_{\mathcal{P}} Q^t}{n_{\mathcal{H}}}}\right).$$

Since  $Q$  function does not decay fast we provide a proof for the case where  $Q^t$  is  $C$ -Lipschitz. From Theorem 6.5 in [41] we have that, there exists a  $c_0 > 0$  such that

$$\|\bar{Q}^t - \mathbb{E}_{\mathcal{P}} Q^t\| \leq c_0. \quad (\text{S.1})$$

Recall that Bellman optimality operator  $\mathcal{T}$  is a contraction mapping. Thus from triangle inequality we have

$$\begin{aligned} \|\mathcal{T}Q_1 - \mathcal{T}Q_2\|_{\infty} &\leq \max_{s', a'} \left\| r(s', a') + \frac{\gamma}{|\mathcal{H}_1|} \sum_{s \in \mathcal{S}} \max_a Q_1(s, a) \right. \\ &\quad \left. - r(s', a') - \frac{\gamma}{|\mathcal{H}_2|} \sum_{s \in \mathcal{S}} \max_a Q_2(s, a) \right\| \\ &\leq \max_{s', a'} \left\| \frac{\gamma}{|\mathcal{H}_1|} \sum_{s \in \mathcal{S}} \max_a Q_1(s, a) - \frac{\gamma}{|\mathcal{H}_2|} \sum_{s \in \mathcal{S}} \max_a Q_2(s, a) \right\| \end{aligned}$$

Let  $|\mathcal{H}_1| = |\mathcal{H}_2| = n_{\mathcal{H}}$ . Then using triangle inequality we have

$$\|\mathcal{T}Q_1 - \mathcal{T}Q_2\|_{\infty} \leq \max_{s', a'} \gamma \left[ \|\bar{Q}_1 - \mathbb{E}_{\mathcal{P}} Q_1\| + \|\bar{Q}_2 - \mathbb{E}_{\mathcal{P}} Q_2\| \right] + \max_{s', a'} \gamma \|\mathbb{E}_{\mathcal{P}} Q_1 - \mathbb{E}_{\mathcal{P}} Q_2\|$$

Since  $Q$  function almost surely converge under exhaustive sampling we have

$$\max_{s', a'} \gamma \|\mathbb{E}_{\mathcal{P}} Q_1 - \mathbb{E}_{\mathcal{P}} Q_2\| \leq \gamma \|Q_1 - Q_2\|_{\infty} \quad (\text{S.2})$$

From (S.1) and (S.2) we have after  $t$  time steps

$$\|\mathcal{T}Q_1 - \mathcal{T}Q_2\|_{\infty} \leq 2c_0 + \gamma \|Q_1 - Q_2\|_{\infty}$$

Let  $R_{max}$  and  $R_{min}$  be the maximum and minimum reward values. Then we have that

$$\|Q_1 - Q_2\|_{\infty} \leq \frac{\gamma}{1 - \gamma} R_{max} - R_{min}.$$

Thus for any  $\epsilon \geq 0$  by choosing a  $\gamma$  such there exists a  $t'$  such that  $\forall t \geq t'$

$$\|Q^t - Q^*\|_{\infty} \leq \epsilon$$

This concludes the proof of Theorem 1.  $\square$

## 457 A.2 Proof of Theorem 2

458 **Theorem 2.** Let  $Q_{\mathcal{E}}^{t+1}(s_t, a_t) = r(s_t, a_t) + \gamma \sum_{s \in \mathcal{S}} \mathbb{P}(s|s_t, a_t) \max_a Q_{\mathcal{E}}^t(s, a), \forall (s_t, a_t) \in \mathcal{S} \times \mathcal{A}$   
 459 be the update rule under exhaustive sampling, and  $Q^t$  be the  $Q$  function updated according to  
 460 Hamiltonian  $Q$ -Learning, i.e. by (9)-(10). Then, for any given  $\tilde{\epsilon} \geq 0$ , there exists  $n_{\mathcal{H}}, t' > 0$ , such  
 461 that  $\|Q^t - Q_{\mathcal{E}}^t\|_{\infty} \leq \tilde{\epsilon} \forall t \geq t'$ .

462 **Proof of Theorem 2.** Note that at each time step we attempt to recover the matrix  $Q_{\mathcal{E}}^t$ , i.e.,  $Q$   
 463 function time  $t$  under exhaustive sampling though a matrix completion method starting from  $\hat{Q}^t$ ,  
 464 which is the  $Q$  updated function at time  $t$  using Hamiltonian  $Q$ -Learning. From Theorem 4 in [24]  
 465 we have that  $\forall t \geq t'$  there exists some constant  $\delta > 0$  such that when the updated  $Q$  function a  $\hat{Q}^t$   
 466 satisfy

$$\|\hat{Q}^t - Q_{\mathcal{E}}^t\|_{\infty} \leq c$$

467 where  $c$  is some positive constant then reconstructed (completed) matrix  $Q^t$  satisfies

$$\|Q^t - Q_{\mathcal{E}}^t\|_{\infty} \leq \delta \|\hat{Q}^t - Q_{\mathcal{E}}^t\|_{\infty} \quad (\text{S.3})$$

468 for some  $\delta > 0$ . This implies that when the initial matrix used for matrix completion is sufficiently  
 469 close to the matrix we are trying to recover matrix completion iterations converge to a global optimum.  
 470 From the result of Theorem 1 we have for any given  $\epsilon \geq 0$ , there exists  $n_{\mathcal{H}}, t' > 0$  such that  $\forall t \geq t'$

$$\|\hat{Q}^t - Q^*\| \leq \epsilon \quad (\text{S.4})$$

471 Recall that under the update equation  $Q_{\mathcal{E}}^{t+1}(s_t, a_t) = r(s_t, a_t) + \gamma \sum_{s \in \mathcal{S}} \max_a Q_{\mathcal{E}}^t(s, a), \forall (s_t, a_t) \in$   
 472  $\mathcal{S} \times \mathcal{A}$  we have that  $Q_{\mathcal{E}}$  almost surely converge to the optimal  $Q^*$ . Thus there exists a  $t^{\dagger}$  such that  
 473  $\forall t \geq t^{\dagger}$

$$\|Q_{\mathcal{E}}^t - Q^*\| \leq \epsilon$$

474 Let  $t^{\ddagger} = \max\{t^{\dagger}, t'\}$ . Then from triangle inequality we have that

$$\|\hat{Q}^t - Q_{\mathcal{E}}^t\| \leq \|\hat{Q}^t - Q^*\| + \|Q_{\mathcal{E}}^t - Q^*\| \leq 2\epsilon.$$

475 Thus from (S.3) we have that

$$\|Q^t - Q_{\mathcal{E}}^t\|_{\infty} \leq 2\delta\epsilon$$

476 This concludes the proof of Theorem 2.  $\square$

## 477 B Sampling Complexity

478 In this section we provide theoretical results on sampling complexity of Hamiltonian  $Q$ -Learning. For  
 479 brevity of notation we define  $\mathcal{M}Q(s) = \max_a Q(s, a)$ . Note that we have the following regularity  
 480 conditions on the MDP studied in this paper.

### 481 Regularity Conditions

- 482 1. Spaces  $\mathcal{S}$  and  $\mathcal{A}$  (state space and action space) are compact subsets of  $\mathbb{R}^{\mathcal{D}_s}$  and  $\mathbb{R}^{\mathcal{D}_a}$   
 483 respectively.
- 484 2. All the rewards are bounded such that  $r(s, a) \in [R_{\min}, R_{\max}]$ , for all  $(s, a) \in \mathcal{S} \times \mathcal{A}$ .
- 485 3. The optimal  $Q^*$  is  $C$ -Lipschitz such that

$$|Q^*(s, a) - Q^*(s', a')| \leq C (\|s - s'\|_F + \|a - a'\|_F)$$

486 Now we prove some useful lemmas for proving sampling complexity of Hamiltonian  $Q$ -Learning

487 **Lemma 1.** For some constant  $c_1$ , if

$$|\Omega_t| \geq c_1 \frac{\max\{|\mathcal{S}|^2, |\mathcal{A}|^2\} |\mathcal{S}| |\mathcal{A}| \mathcal{D}_s \mathcal{D}_a}{\log(\mathcal{D}_s + \mathcal{D}_a)}$$

488 with  $\left\| \widehat{Q}^t(s, a) - Q^*(s, a) \right\|_\infty \leq \epsilon$  then there exists a constant  $c_2$  such that

$$\left\| Q^t(s, a) - Q^*(s, a) \right\|_\infty \leq c_2 \epsilon$$

489 **Proof of Lemma 1.** Recall that in order to complete a low rank matrix using matrix estimation  
 490 methods, the matrix can not be sparse. This condition can be formulated using the notion of  
 491 incoherence. Let  $Q$  be a matrix of rank  $r_Q$  with the singular value decomposition  $Q = U \Sigma V^T$ . Let  
 492  $T_Q$  be the orthogonal projection of  $Q \in \mathbb{R}^{|\mathcal{S}| \times |\mathcal{A}|}$  to its column space. Then incoherence parameter  
 493 of  $\phi(Q)$  can be give as

$$\phi(Q) = \max \left\{ \frac{|\mathcal{S}|}{r_Q} \max_{1 \leq i \leq |\mathcal{S}|} \|T_U \mathbf{e}_i\|_F^2, \frac{|\mathcal{A}|}{r_Q} \max_{1 \leq i \leq |\mathcal{A}|} \|T_U \mathbf{e}_i\|_F^2 \right\}$$

494 where  $\mathbf{e}_i$  are the standard basis vectors. Recall that  $Q^t$  is the matrix generated in matrix completion  
 495 phase from  $\widehat{Q}$ . From Theorem 4 in [24] we have that for some constant  $C_1$  if a fraction of  $p$  elements  
 496 are observed from the matrix such that

$$p \geq C_1 \frac{\phi_t^2 r_Q^2 \mathcal{D}_s \mathcal{D}_a}{\log(\mathcal{D}_s + \mathcal{D}_a)}$$

497 where  $\phi_t$  is the coherence parameter of  $Q^t$  then with probability at least  $1 - C_2(\mathcal{D}_s + \mathcal{D}_a)^{-1}$  for  
 498 some constant  $C_2$  with  $\left\| \widehat{Q}^t(s, a) - Q^*(s, a) \right\|_\infty \leq \epsilon$  there exists a constant  $c_2$  such that

$$\left\| Q^t(s, a) - Q^*(s, a) \right\|_\infty \leq c_2 \epsilon$$

499 Note that  $p \approx \frac{|\Omega_t|}{|\mathcal{S}| |\mathcal{A}|}$ . Further we have for some constant  $c_3$

$$\frac{\phi_t^2 r_Q^2 \mathcal{D}_s \mathcal{D}_a}{\log(\mathcal{D}_s + \mathcal{D}_a)} = c_3 \frac{\max\{|\mathcal{S}|^2, |\mathcal{A}|^2\} \mathcal{D}_s \mathcal{D}_a}{\log(\mathcal{D}_s + \mathcal{D}_a)}$$

500 Thus it follows that for some constant  $c_1$  if

$$|\Omega_t| = c_1 \frac{\max\{|\mathcal{S}|^2, |\mathcal{A}|^2\} |\mathcal{S}| |\mathcal{A}| \mathcal{D}_s \mathcal{D}_a}{\log(\mathcal{D}_s + \mathcal{D}_a)}$$

501 with  $\left\| \widehat{Q}^t(s, a) - Q^*(s, a) \right\|_\infty \leq \epsilon$  then there exists a constant  $c_2$  such that

$$\left\| Q^t(s, a) - Q^*(s, a) \right\|_\infty \leq c_2 \epsilon$$

502 This concludes the proof of Lemma 1.  $\square$

503 **Lemma 2.** Let  $1 - \xi$  be the spectral gap of Markov chain under Hamiltonian sampling where  
 504  $\xi \in [0, 1]$ . Let  $\Delta R = R_{\max} - R_{\min}$  be the maximum reward gap. Then  $\forall (s', a') \in \mathcal{S} \times \mathcal{A}$  we have  
 505 that

$$\left| \widehat{Q}(s', a') - Q^*(s', a') \right| \leq \frac{\gamma^2}{1 - \gamma} \Delta R + \sqrt{\frac{1 + \xi}{1 - \xi} \frac{2}{|\mathcal{H}|} \left( \frac{\gamma R_{\max}}{1 - \gamma} \right)^2 \log \left( \frac{2}{\delta} \right)}.$$

506 with at least probability  $1 - \delta$ .

507 **Proof of Lemma 2.** Let  $\widehat{Q}(s', a') = r(s', a') + \frac{\gamma}{|\mathcal{H}|} \sum_{s \in \mathcal{H}} \max_a Q(s, a)$ . Recall that  $\mathcal{M}Q(s) =$   
 508  $\max_a Q(s, a)$ . Then we have that  $\widehat{Q}(s', a') = r(s', a') + \frac{\gamma}{|\mathcal{H}|} \sum_{s \in \mathcal{H}} \mathcal{M}Q(s)$ . Then it follows that

$$\begin{aligned} |\widehat{Q}(s', a') - Q^*(s', a')| &= \left| r(s', a') + \frac{\gamma}{|\mathcal{H}|} \sum_{s \in \mathcal{H}} \mathcal{M}Q(s) - r(s', a') - \gamma \mathbb{E}_{\mathcal{P}} \mathcal{M}Q^*(s) \right| \\ &= \left| \frac{\gamma}{|\mathcal{H}|} \sum_{i=1}^{|\mathcal{H}|} \mathcal{M}Q(s_i) - \gamma \mathbb{E}_{\mathcal{P}} \mathcal{M}Q^*(s) \right| \\ &= \left| \frac{\gamma}{|\mathcal{H}|} \sum_{i=1}^{|\mathcal{H}|} \mathcal{M}Q(s_i) - \frac{\gamma}{|\mathcal{H}|} \sum_{i=1}^{|\mathcal{H}|} \mathcal{M}Q^*(s_i) \right| \\ &\quad + \left| \frac{\gamma}{|\mathcal{H}|} \sum_{i=1}^{|\mathcal{H}|} \mathcal{M}Q^*(s_i) - \gamma \mathbb{E}_{\mathcal{P}} \mathcal{M}Q^*(s) \right| \end{aligned} \quad (\text{S.5})$$

509 Recall that all the rewards are bounded such that  $r(s, a) \in [R_{\min}, R_{\max}]$ , for all  $(s, a) \in \mathcal{S} \times \mathcal{A}$ .  
 510 Thus for all  $s, a$  we have that  $\mathcal{M}Q(s) \leq \frac{\gamma}{1-\gamma} R_{\max}$ . Let  $\Delta R = R_{\max} - R_{\min}$ . Then we have that

$$\left| \frac{\gamma}{|\mathcal{H}|} \sum_{i=1}^{|\mathcal{H}|} \mathcal{M}Q(s_i) - \frac{\gamma}{|\mathcal{H}|} \sum_{i=1}^{|\mathcal{H}|} \mathcal{M}Q^*(s_i) \right| \leq \frac{\gamma^2}{1-\gamma} \Delta R. \quad (\text{S.6})$$

511 Let  $\xi \in [0, 1]$  be a constant such that  $1 - \xi$  is the spectral gap of the Markov chain under Hamiltonian  
 512 sampling. Then from [42] we have that

$$\mathbb{P} \left( \frac{1}{|\mathcal{H}|} \sum_{i=1}^{|\mathcal{H}|} \mathcal{M}Q^*(s_i) - \mathbb{E}_{\mathcal{P}} \mathcal{M}Q^*(s) \geq \vartheta \right) \leq \exp \left( -\frac{1-\xi}{1+\xi} \frac{|\mathcal{H}| \vartheta^2}{2R_{\max}^2} \left( \frac{1-\gamma}{\gamma} \right)^2 \right)$$

513 Let  $\delta = \exp \left( -\frac{1-\xi}{1+\xi} \frac{|\mathcal{H}| \vartheta^2}{2R_{\max}^2} \left( \frac{1-\gamma}{\gamma} \right)^2 \right)$ . Then we have that

$$\vartheta = \sqrt{\frac{1+\xi}{1-\xi} \frac{2}{|\mathcal{H}|} \left( \frac{\gamma R_{\max}}{1-\gamma} \right)^2 \log \left( \frac{2}{\delta} \right)}.$$

514 Thus we see that

$$\left| \frac{1}{|\mathcal{H}|} \sum_{i=1}^{|\mathcal{H}|} \mathcal{M}Q^*(s_i) - \mathbb{E}_{\mathcal{P}} \mathcal{M}Q^*(s) \right| \leq \sqrt{\frac{1+\xi}{1-\xi} \frac{2}{|\mathcal{H}|} \left( \frac{\gamma R_{\max}}{1-\gamma} \right)^2 \log \left( \frac{2}{\delta} \right)} \quad (\text{S.7})$$

515 with at least probability  $1 - \delta$ . Thus it follows from equations (S.5), (S.6) and (S.7) that

$$|\widehat{Q}(s', a') - Q^*(s', a')| \leq \frac{\gamma^2}{1-\gamma} \Delta R + \sqrt{\frac{1+\xi}{1-\xi} \frac{2}{|\mathcal{H}|} \left( \frac{\gamma R_{\max}}{1-\gamma} \right)^2 \log \left( \frac{2}{\delta} \right)}.$$

516 with at least probability  $1 - \delta$ . This concludes the proof of Lemma 2.  $\square$

517 **Lemma 3.** For all  $(s, a) \in \mathcal{S} \times \mathcal{A}$  we have that

$$|Q^t(s, a) - Q^*(s, a)| \leq 2c_1 \frac{\gamma^2 R_{\max}}{1-\gamma}$$

518 with probability at least  $1 - \delta$

519 **Proof of Lemma 3.** From Lemma 2 and [14] we have that for all  $(s, a) \in \Omega_t$

$$|\widehat{Q}^t(s, a) - Q^*(s, a)| \leq \frac{\gamma^2}{1-\gamma} \Delta R + \sqrt{\frac{1+\xi}{1-\xi} \frac{2}{|\mathcal{H}_t|} \left( \frac{\gamma R_{\max}}{1-\gamma} \right)^2 \log \left( \frac{2|\Omega_t|T}{\delta} \right)}. \quad (\text{S.8})$$

520 with probability at least  $1 - \frac{\delta}{T}$ . Thus we have that

$$|Q^t(s, a) - Q^*(s, a)| \leq c_1 \frac{\gamma^2}{1-\gamma} \Delta R + c_1 \sqrt{\frac{1+\xi}{1-\xi} \frac{2}{|\mathcal{H}_t|} \left( \frac{\gamma R_{\max}}{1-\gamma} \right)^2 \log \left( \frac{2|\Omega_t|T}{\delta} \right)}.$$

521 with probability at least  $1 - \frac{\delta}{T}$ . Fro all  $1 \leq t \leq T$  letting

$$|\mathcal{H}_t| = \frac{1+\xi}{1-\xi} \frac{2}{\gamma^2} \log \left( \frac{2|\Omega_t|T}{\delta} \right)$$

522 we obtain

$$\frac{\gamma^2}{1-\gamma} R_{\max} \geq \sqrt{\frac{1+\xi}{1-\xi} \frac{2}{|\mathcal{H}_t|} \left( \frac{\gamma R_{\max}}{1-\gamma} \right)^2 \log \left( \frac{2|\Omega_t|T}{\delta} \right)}.$$

523 Thus we have,

$$|Q^t(s, a) - Q^*(s, a)| \leq 2c_1 \frac{\gamma^2 R_{\max}}{1-\gamma}$$

524 with probability at least  $1 - \delta$ . Recall that  $\forall (s, a) \in \mathcal{S} \times \mathcal{A}$  we have  $\mathcal{M}Q(s, a) \leq \frac{\gamma \Delta R}{1-\gamma}$ . Thus this  
525 also proves that

$$|Q^t(s, a) - Q^*(s, a)| \leq 2c_1 \gamma |Q^{t-1}(s, a) - Q^*(s, a)|$$

526 This concludes the proof of Lemma 3.  $\square$

527 Now we proceed to prove the main theorem for sampling complexity as follows.

528 **Theorem 3.** *Let  $\mathcal{D}_s, \mathcal{D}_a$  be the dimension of state space and action space respectively. Consider the*  
529 *Hamiltonian Q-Learning algorithm presented in Algorithm 1. Under a suitable matrix completion*  
530 *method sampling complexity of the algorithm,  $Q$  function converge to the family of  $\epsilon$ -optimal  $Q$*   
531 *functions with  $\tilde{O}(\epsilon^{-(\mathcal{D}_s + \mathcal{D}_a + 2)})$  number of samples.*

532 **Proof of Theorem 3.** Note that sample complexity of Hamiltonian Q-Learning can be given as

$$\sum_{t=1}^{T_\epsilon} |\Omega_t| |\mathcal{H}_t| \leq T_\epsilon |\Omega_{T_\epsilon}| |\mathcal{H}_{T_\epsilon}|$$

533 Let  $\beta^t$  be the discretization parameter at time  $t$  and  $T_\epsilon = \frac{\log(\frac{\gamma R_{\max}}{(1-\gamma)\epsilon})}{\log(\frac{1}{2\gamma c_1})}$ . Then from Lemmas 1, 2 and 3  
534 it follows that

$$\sum_{t=1}^{T_\epsilon} |\Omega_t| |\mathcal{H}_t| = \tilde{O} \left( \frac{1}{\epsilon^{\mathcal{D}_s + \mathcal{D}_a + 2}} \right)$$

535 This concludes the proof of Theorem 3.  $\square$

## 536 C Additional Experimental Details for Benchmark Control Tasks

537 In this section we provide additional details related to the experimental results presented in this paper.

### 538 C.1 Experimental Setup

539 We consider the case that state transition is stochastic due to system noise arise from model uncer-  
540 tainties. Following the conventional approach we model these parameter uncertainties and external  
541 disturbances using a multivariate Gaussian perturbation [43, 44, 45]. For all the control tasks we  
542 consider the dynamic equations given in [14]. For all simulations we take 100 HMC samples during  
543 the update phase. We use trajectory length  $L = 100$  and step size  $\delta l = 0.02$ . We randomly initialize  
544 the  $Q$  matrix using values between 0 and 1.

545 **Inverted Pendulum** Let  $\theta, \dot{\theta}$  be the angle of the pendulum, respectively. Then, by letting  $a$  denote  
546 the input torque applied to the pendulum, its dynamics can be expressed as

$$\ddot{\theta} - \sin \theta + \dot{\theta} - a = 0. \tag{S.9}$$

547 The state space associated with the pendulum is 2-dimensional ( $\mathcal{D}_s = 2$ ) and any state  $s \in \mathcal{S}$  is  
 548 given by  $s = (\theta, \dot{\theta})$ . We define the range of state space as  $\theta \in [-\pi, \pi]$  and  $\dot{\theta} \in [-10, 10]$ . We  
 549 consider action space to be a 1-dimensional ( $\mathcal{D}_a = 1$ ) space such that  $a \in [-1, 1]$ . We discretize  
 550 each dimension in state space into 25 values and the action space into 10 values. This forms a  $Q$   
 551 matrix of dimension  $625 \times 10$ .

552 Also, we consider the noise co-variance of the Gaussian perturbation to be  $\Sigma = \text{diag}[0.868, 1.550]$ .

553 Let  $s_t = (\theta_t, \dot{\theta}_t)$  and  $a_t$  be the state and the action at time  $t$ . Then the state transition probability  
 554 kernel and corresponding target distribution can be given using (7) and (8), respectively, with mean  
 555  $\mu(s_t, a_t) = (\theta_t + \dot{\theta}_t \tau, \dot{\theta}_t + \ddot{\theta}_t \tau)$ , where  $\tau$  is the discretized time interval and  $\ddot{\theta}_t$  can be obtained  
 556 from (S.9) by substituting  $\theta_t, \dot{\theta}_t, a_t$ , and co-variance  $\Sigma(s_t, a_t) = \Sigma$ .

557 As our goal is to stabilize the pendulum to the upright position (i.e. to  $\theta = 0$ ) while minimizing the  
 558 amount of applied torque, we consider the reward function as follows

$$r(\theta, \dot{\theta}, a) = -0.1a^2 + \exp(\cos \theta - 1).$$

559 **Double Integrator** By letting  $x, \dot{x}$ , and  $a$  denote the position, velocity, and input torque, respec-  
 560 tively, we can express the system dynamics as

$$\ddot{x} = a. \quad (\text{S.10})$$

561 State space of the double integrator is 2-dimensional ( $\mathcal{D}_s = 2$ ) and any state  $s \in \mathcal{S}$  is given as  
 562  $s = (x, \dot{x})$ . We define the range of state space as  $x \in [-3, 3]$  and  $\dot{x} \in [-3, 3]$ . We consider action  
 563 space to be a 1-dimensional ( $\mathcal{D}_a = 1$ ) space such that  $a \in [-1, 1]$ . We discretize each dimension  
 564 in state space into 25 values and action space into 10 values. This forms a  $Q$  matrix of dimension  
 565  $625 \times 10$ .

566 Here we consider the noise co-variance of the Gaussian perturbation to be  $\Sigma = \text{diag}[0.848, 0.848]$ .

567 Let  $s_t = (x_t, \dot{x}_t)$  and  $a_t$  be the state and the action at time  $t$ . Then the state transition probability  
 568 kernel and corresponding target distribution can be given using (7) and (8), respectively, with mean  
 569  $\mu(s_t, a_t) = (x_t + \dot{x}_t \tau, \dot{x}_t + \ddot{x}_t \tau)$ , where  $\tau$  is the discretized time interval and  $\ddot{x}_t$  can be obtained  
 570 from (S.10) by substituting  $x_t, \dot{x}_t, a_t$ , and co-variance  $\Sigma(s_t, a_t) = \Sigma$ .

571 We define the reward function as the quadratic cost

$$r(x, \dot{x}, a) = -\frac{1}{2} (x^2 + \dot{x}^2).$$

572 **Cartpole** Let  $\theta, \dot{\theta}$  be the angle and angular velocity of the pole, respectively. Similarly, let  $x, \dot{x}$  be  
 573 the position and linear velocity of the cart, respectively. Then, by letting  $a$  denote the control force  
 574 applied to the cart, the dynamics of cart-pole system [?] can be expressed as

$$\begin{aligned} l \left( \frac{4}{3} (m + M) - m \cos^2 \theta \right) \ddot{\theta} + (a + m l \dot{\theta}^2 \sin \theta) \cos \theta - (m + M) g \sin \theta &= 0 \\ (m + M) \ddot{x} - m l \left( \dot{\theta}^2 \sin \theta - \ddot{\theta} \cos \theta \right) - a &= 0 \end{aligned} \quad (\text{S.11})$$

575 where,  $m, M, l$  and  $g$  represent the mass of the pole, mass of the cart, length of the pole and the  
 576 gravitational acceleration, respectively.

577 State space of the cart-pole system is 4-dimensional ( $\mathcal{D}_s = 4$ ) and any state  $s \in \mathcal{S}$  is given by  $s =$   
 578  $(\theta, \dot{\theta}, x, \dot{x})$ . We define the range of state space as  $\theta \in [-\pi/2, \pi/2], \dot{\theta} \in [-3.0, 3.0], x \in [-2.4, 2.4]$   
 579 and  $\dot{x} \in [-3.5, 3.5]$ . We consider action space to be a 1-dimensional ( $\mathcal{D}_a = 1$ ) space such that  
 580  $a \in [-10, 10]$ . We discretize each dimension in state space into 5 values and action space into 10  
 581 values. This forms a  $Q$  matrix of dimensions  $625 \times 10$ .

582 Although the differential equations (S.11) governing the dynamics of the pendulum on a cart system  
 583 are deterministic, uncertainty of the parameters and external disturbances to the system causes the cart  
 584 pole to deviate from the defined dynamics leading to a stochastic state transition. Here we consider  
 585 the co-variance of the Gaussian perturbation to be  $\Sigma = \text{diag}[0.641, 0.848, 0.759, 0.917]$ .

Let  $s_t = (\theta_t, \dot{\theta}_t, x_t, \dot{x}_t)$  and  $a_t$  be the state and the action at time  $t$ . Then the state transition probability kernel and corresponding target distribution can be given using (7) and (8), respectively, with mean  $\mu(s_t, a_t) = (\theta_t + \dot{\theta}_t\tau, \dot{\theta}_t + \ddot{\theta}_t\tau, x_t + \dot{x}_t\tau, \dot{x}_t + \ddot{x}_t\tau)$ , where  $\tau$  is the discretized time interval and  $\ddot{\theta}_t, \ddot{x}_t$  can be obtained from (S.11) by substituting  $\theta_t, \dot{\theta}_t, a_t$ , and co-variance  $\Sigma(s_t, a_t) = \Sigma$ .

Our simulation results use the following value for the system parameters -  $m = 0.1kg$ ,  $M = 1kg$ ,  $l = 0.5m$  and  $g = 9.8ms^{-2}$ . The goal is stabilizing the pole in upright position. Thus we consider the reward function

$$r(\theta, \dot{\theta}, x, \dot{x}, a) = \cos^4(15\theta)$$

**Acrobot** Let  $\theta_1, \dot{\theta}_1$  be the angle and angular velocity of the first pole, respectively. Similarly, let  $\theta_2, \dot{\theta}_2$  be the angle and angular velocity of the first pole, respectively. Then, by letting  $a$  denote the control torque applied to the second joint, dynamics of the acrobot can be expressed as

$$\begin{aligned}\ddot{\theta}_2 &= \frac{a + \frac{D_2}{D_1}\phi_1 - m_2l_1l_{c2}\dot{\theta}_1^2\sin\theta_2 - \phi_2}{m_2(l_2^2 + l_{c2}^2) - \frac{D_2^2}{D_1}} \\ \ddot{\theta}_1 &= -\frac{D_2\ddot{\theta}_2 + \phi_1}{D_1},\end{aligned}\tag{S.12}$$

where,

$$\begin{aligned}D_1 &= m_1(l_1^2 + l_{c1}^2) + m_2(l_1^2 + l_2^2 + l_{c2}^2 + 2l_1l_{c2}\cos\theta_2) \\ D_2 &= m_2(l_2^2 + l_{c2}^2 + l_1l_{c2}\cos\theta_2) \\ \phi_2 &= m_2l_{c2}g\sin(\theta_1 + \theta_2) \\ \phi_1 &= -m_2l_{c2}\dot{\theta}_2(\dot{\theta}_2 + 2\dot{\theta}_1)\sin\theta_2 + (m_1l_{c1} + m_2l_1)g\sin\theta_1 + phi_2,\end{aligned}$$

and  $m_1, m_2, l_1, l_2$  and  $g$  represent the mass of the poles, length of the poles, and the gravitational acceleration, respectively. We have used  $l_{c1} = l_1/2$  and  $l_{c2} = l_2/2$ . Moreover, our simulation results use the following value for the system parameters:  $m_1 = m_2 = 0.1kg$ ,  $l_1 = l_2 = 0.1m$  and  $g = 9.8ms^{-2}$ .

State space of the acrobot is 4-dimensional ( $\mathcal{D}_s = 4$ ) and any state  $s \in \mathcal{S}$  is given by  $s = (\theta_1, \dot{\theta}_1, \theta_2, \dot{\theta}_2)$ . We define the range of state space as  $\theta_i \in [-\pi, \pi]$  and  $\dot{\theta}_i \in [-10.0, 10.0]$ ,  $i = 1, 2$ . We consider action space to be a 1-dimensional ( $\mathcal{D}_a = 1$ ) space such that  $a \in [-1, 1]$ . We discretize each dimension in state space into 5 values and action space into 10 values. This forms a  $Q$  matrix of dimensions  $625 \times 10$ .

To incorporate the effects from uncertainty in the parameters and external disturbances to the system, we consider the co-variance of the Gaussian perturbation to the system be  $\Sigma = \text{diag}[0.686, 1.550, 0.686, 1.550]$ .

Let  $s_t = (\theta_{1t}, \dot{\theta}_{1t}, \theta_{2t}, \dot{\theta}_{2t})$  and  $a_t$  be the state and the action at time  $t$ . Then the state transition probability kernel and corresponding target distribution can be given by (7) and (8), respectively, with mean  $\mu(s_t, a_t) = (\theta_{1t} + \dot{\theta}_{1t}\tau, \dot{\theta}_{1t} + \ddot{\theta}_{1t}\tau, \theta_{2t} + \dot{\theta}_{2t}\tau, \dot{\theta}_{2t} + \ddot{\theta}_{2t}\tau)$ , where  $\tau$  is the discretized time interval and  $\ddot{\theta}_{1t}, \ddot{\theta}_{2t}$  can be obtained from (S.12) by substituting  $\theta_t, \dot{\theta}_t, a_t$ , and co-variance  $\Sigma(s_t, a_t) = \Sigma$ .

As the objective is to stabilize the acrobot to the upright position, we define the reward function as

$$r(\theta_1, \dot{\theta}_1, \theta_2, \dot{\theta}_2, a) = \exp(-\cos\theta_1 - 1) + \exp(-\cos(\theta_1 + \theta_2) - 1).$$

## C.2 Comparison with Deep RL Algorithms

We provided results combining HMC sampling with benchmark Deep RL algorithms DQN and DDPG. We used the same network architecture of DQN and DDPG presented in the original papers [1, 46]. To train the networks, we used the Adam optimizer [47] with learning rate  $1e^{-5}$ , discount coefficient  $\gamma = 0.99$ , and batchsize 32. For all results provided in this paper we used following hyper parameters. Also, we set the number of steps between target network update to 10,000.
